# Supplementary material for: γ-Aminobutyric acids (GABA) and serum GABA/AABA (G/A) ratio as potential biomarkers of physical performance and aging
Source: Research Square preprint supplement (doi:10.21203/rs.3.rs-2492780/v1), 2023-01-31
Supplement: Supplementary file 1 [file b5ff9df7f58971f7cea23fa3.docx]

**Table 1.** Characteristics on females and males by performance (low, average, high).

|  | **FEMALES** | | | | | | | | | | | | |
| --- | --- | --- | --- | --- | --- | --- | --- | --- | --- | --- | --- | --- | --- |
|  | **20-35 years** | | | **35-50 years** | | | **50-65 years** | | | | **65+** | | |
|  | **Low** | **Average** | **High** | **Low** | **Average** | **High** | **Low** | | **Average** | **High** | **Low** | **Average** | **High** |
| Age (yr) | 26.6 ± 3.8 | 27.4 ± 4.2 | 27.5 ± 5.2 | 44.3 ± 5.5 | 45.2 ± 3.5 | 45.1 ± 5.1 | 57.2 ± 4.4 | | 57.9 ± 2.7 | 53.3 ± 1.3 | 76.4 ± 7.1 | 73.9 ± 1.6 | 68.3 ± 3.5 |
| Height (m) | 1.62 ± 0.07 | 1.68 ± 0.05 | 1.67 ± 0.05 | 1.63 ± 0.05 | 1.65 ± 0.06 | 1.69 ± 0.05 | 1.63 ± 0.02 | | 1.64 ± 0.06 | 1.69 ± 0.08 | 1.62 ± 0.08 | 1.59 ± 0.04 | 1.64 ± 0.04 |
| Weight (kg) | 67.4 ± 10.3 | 63.1 ± 5.2 | 69.0 ± 6.7 | 84.7 ± 13.1 | 73.2 ± 9.6 | 75.2 ± 14.0 | 76.7 ± 12.5 | | 72.9 ± 10.0 | 72.7 ± 12.2 | 71.6 ± 13.6 | 65.7 ± 10.5 | 71.4 ± 23.9 |
| BMI (kg/m2) | 25.6 ± 3.9 | 22.5 ± 1.6 | 25.0 ± 3.4 | 31.8 ± 5.4 | 27.1 ± 4.8 | 26.5 ± 5.1 | 29.0 ± 5.3 | | 27.3 ± 4.4 | 25.7 ± 3.8 | 27.3 ± 3.9 | 26.1 ± 3.8 | 26.9 ± 10.3 |
| PROMIS physical function score | 54.2 ± 7.1 | 62.0 ± 6.9 | 63.0 ± 4.4 | 52.2 ± 3.3 | 51.3 ± 3.8 | 57.9 ± 8.9 | 53.1 ± 6.9 | | 51.4 ± 5.0 | 64.9 ± 5.7 | 48.3 ± 2.5 | 53.1 ± 4.0 | 54.6 ± 3.82 |
| SF36-physical function score | 96 ± 4 | 100 ± 0 | 100 ± 0 | 96 ± 4 | 93 ± 8 | 96 ± 5 | 92 ± 8 | | 87 ± 6 | 99 ± 2 | 87 ± 12 | 85 ± 9 | 95 ± 6 |
| Grip strength (kg) | 17.4 ± 3.1 | 28.2 ± 0.9 | 37.0 ± 2.5 | 16.9 ± 6.5 | 26.8 ± 0.6 | 37.1 ± 2.6 | 16.7 ± 2.4 | | 25.4 ± 0.3 | 35.8 ± 2.1 | 17.1 ± 4.0 | 21.5 ± 0.8 | 31.2 ± 3.0 |
| Grip strength (z-score) | -1.72 ± 0.52 | 0.04 ± 0.13 | 1.43 ± 0.35 | -1.73 ± 1.17 | 0.10 ± 0.15 | 1.90 ± 0.39 | -1.53 ± 0.56 | | 0.16 ± 0.13 | 1.98 ± 0.41 | -0.74 ± 1.24 | 0.09 ± 0.16 | 1.91 ± 0.67 |
| Repeat chair stands in 30s (n) | 12.4 ± 2.2 | 17.8 ± 1.3 | 24.6 ± 3.1 | 11.4 ± 0.6 | 16.8 ± 0.8 | 25.6 ± 3.8 | | 11.8 ± 0.8 | 15.0 ± 1.0 | 22.4 ± 2.1 | 11.4 ± 2.1 | 13.2 ± 1.3 | 19.8 ± 1.8 |
| Repeat chair stands in 30s (z-score) | -1.55 ± 0.81 | 0.01 ± 0.37 | 1.53 ± 0.51 | -1.56 ± 0.24 | 0.11 ± 0.21 | 1.87 ± 0.61 | | -1.16 ± 0.24 | -0.10 ± 0.27 | 1.50 ± 0.42 | -0.67 ± 0.65 | -0.06 ± 0.49 | 1.55 ± 0.48 |

|  | **MALES** | | | | | | | | | | | |
| --- | --- | --- | --- | --- | --- | --- | --- | --- | --- | --- | --- | --- |
|  | **20-35 years** | | | **35-50 years** | | | **50-65 years** | | | **65+** | | |
|  | **Low** | **Average** | **High** | **Low** | **Average** | **High** | **Low** | **Average** | **High** | **Low** | **Average** | **High** |
| Age (yr) | 23.9 ± 4.5 | 26.4 ± 3.1 | 26.9 ± 4.6 | 40.6 ± 2.2 | 40.9 ± 3.8 | 42.7 ± 5.5 | 62.2 ± 3.1 | 57.9 ± 5.5 | 54.1 ± 3.8 | 73.9 ± 6.6 | 70.5 ± 6.3 | 69.0 ± 5.5 |
| Height (m) | 1.77 ± 0.08 | 1.80 ± 0.06 | 1.82 ± 0.06 | 1.82 ± 0.05 | 1.74 ± 0.05 | 1.77 ± 0.07 | 1.77 ± 0.10 | 1.80 ± 0.05 | 1.79 ± 0.11 | 1.70 ± 0.04 | 1.74 ± 0.05 | 1.75 ± 0.04 |
| Weight (kg) | 71.0 ± 9.0 | 90.5 ± 15.0 | 82.8 ± 10.1 | 84.9 ± 11.8 | 87.9 ± 14.5 | 84.1 ± 10.3 | 80.1 ± 3.5 | 91.1 ± 13.5 | 87.7 ± 12.9 | 88.7 ± 14.8 | 80.3 ± 9.8 | 82.1 ± 8.4 |
| BMI (kg/m2) | 22.9 ± 2.0 | 27.9 ± 4.6 | 24.9 ± 2.8 | 25.5 ± 3.3 | 29.1 ± 4.9 | 26.8 ± 3.1 | 26.8 ± 2.6 | 28.0 ± 3.2 | 27.4 ± 2.3 | 30.8 ± 6.5 | 26.5 ± 3.4 | 26.8 ± 3.1 |
| PROMIS physical function score | 56.2 ± 6.7 | 59.9 ± 5.6 | 66.2 ± 4.7 | 56.1 ± 9.5 | 58.1 ± 4.2 | 67.8 ± 1.5 | 54.3 ± 7.0 | 53.1 ± 1.3 | 58.6 ± 5.4 | 47.7 ± 6.3 | 55.7 ± 5.4 | 56.2 ± 6.4 |
| SF36-physical function score | 97 ± 4 | 99 ± 2 | 100 ± 0 | 95 ± 5 | 99 ± 6 | 100 ± 0 | 92 ± 8 | 97 ± 3 | 98 ± 3 | 51 ± 29 | 87 ± 19 | 93 ± 10 |
| Grip strength (kg) | 34.5 ± 3.7 | 47.8 ± 1.3 | 59.0 ± 3.2 | 40.3 ± 2.1 | 48.1 ± 1.2 | 56.5 ± 3.6 | 34.6 ± 3.8 | 43.1 ± 3.1 | 52.6 ± 6.0 | 23.0 ± 7.9 | 36.5 ± 1.4 | 41.8 ± 1.8 |
| Grip strength (z-score) | -1.26 ± 0.34 | 0.03 ± 0.18 | 1.03 ± 0.24 | -0.72 ± 0.22 | 0.06 ± 0.33 | 0.88 ± 0.27 | -0.58 ± 0.51 | 0.21 ± 0.38 | 1.05 ± 0.67 | -1.49 ± 0.95 | 0.13 ± 0.55 | 0.73 ± 0.24 |
| Repeat chair stands in 30s (n) | 12.0 ± 1.9 | 18.2 ± 1.5 | 26.6 ± 3.9 | 15.4 ± 0.9 | 19.2 ± 3.4 | 26.0 ± 3.8 | 13.4 ± 2.9 | 16.8 ± 1.1 | 21.8 ± 2.9 | 9.8 ± 1.9 | 14.8 ± 2.5 | 21.6 ± 2.3 |
| Repeat chair stands in 30s (z-score) | -1.79 ± 0.72 | 0.04 ± 0.36 | 1.72 ± 0.61 | -0.55 ± 0.22 | 0.33 ± 0.66 | 1.62 ± 0.62 | -0.63 ± 0.80 | 0.14 ± 0.27 | 1.06 ± 0.49 | -1.26 ± 0.63 | 0.02 ± 0.62 | 1.38 ± 0.56 |
