# Supplementary material for: γ-Aminobutyric acids (GABA) and serum GABA/AABA (G/A) ratio as potential biomarkers of physical performance and aging
Source: Research Square preprint supplement (doi:10.21203/rs.3.rs-2492780/v1), 2023-01-31
Supplement: Supplementary file 2 [file bc7655cb579a4ca83c7b3336.docx]

**Supplementary Data**

|  | Parameters | N total | Mean | SD | Median | Range | |
| --- | --- | --- | --- | --- | --- | --- | --- |
| Minimum | Maximum |
| Characteristics of participants | Age (years) | 120 | 49.60 | 17.58 | 50.08 | 20.09 | 84.73 |
| Height (cm) | 120 | 170.70 | 8.91 | 169.55 | 149.00 | 191.80 |
| Weight (kg) | 120 | 78.13 | 13.62 | 77.80 | 54.10 | 114.10 |
| BMI (kg/m2) | 120 | 26.83 | 4.48 | 25.55 | 19.70 | 45.10 |
| Appendicular lean mass per height (ALM/height, kg/m) | 117 | 7.84 | 1.39 | 7.98 | 4.64 | 12.14 |
| Whole body BMD (g/cm2) | 116 | 1.11 | 0.15 | 1.11 | 0.77 | 1.43 |
| Spine BMD (g/cm2) | 117 | 1.09 | 0.17 | 1.09 | 0.68 | 1.45 |
| Femoral Neck BMD (g/cm2) | 117 | 0.89 | 0.17 | 0.85 | 0.55 | 1.35 |
| Physical performance scales | Total SPPB score | 120 | 11.65 | 0.88 | 12.00 | 7.00 | 12.00 |
| SPPB gait speed score | 120 | 3.99 | 0.09 | 4.00 | 3.00 | 4.00 |
| Usual gait speed (m/s) | 120 | 1.40 | 0.18 | 1.40 | 0.74 | 2.00 |
| Fast gait speed (m/s) | 120 | 2.05 | 0.34 | 2.05 | 1.01 | 3.28 |
| Best Grip Strength (kg) | 120 | 34.53 | 12.80 | 34.85 | 6.60 | 63.00 |
| Time for 5 chair stands (s) | 120 | 8.87 | 2.96 | 8.08 | 2.13 | 19.77 |
| 6-min walk test (m) | 117 | 569.62 | 109.81 | 580.00 | 160.00 | 969.00 |
| PROMIS score | 120 | 56.42 | 7.27 | 54.70 | 40.40 | 73.30 |
| SF-36 PFS raw score | 120 | 92.96 | 12.79 | 100.00 | 20.00 | 100.00 |

**Supplementary Table 1.** Demographics and Characteristics of 120 white non-Hispanic individuals (aged 20–85 years) recruited from the ICMH-Clinical Research Center FitCore Program.

|  | **Variables** | **Physical performance levels** | **Pearson Correlations** | | | | | | | | | | | |  | | **Spearman Rank Correlations** | | | | | | | | | | | | | | | | | | |
| --- | --- | --- | --- | --- | --- | --- | --- | --- | --- | --- | --- | --- | --- | --- | --- | --- | --- | --- | --- | --- | --- | --- | --- | --- | --- | --- | --- | --- | --- | --- | --- | --- | --- | --- | --- |
| **Female** | | | | |  | **Male** | | | | | |  | | **Female** | | | | |  | | | **Male** | | | | | | | | | | |
| **N** | **Age** | | **BMI** | |  | **N** | **Age** | | **BMI** | | |  | | **N** | **Age** | | **BMI** | | | |  | | | **N** | | **Age** | | | **BMI** | | |
| **r** | **p-value** | **r** | **p-value** |  |  | **r** | **p-value** | **r** | **p-value** |  | |  | | **ρ** | **p-value** | **ρ** | **p-value** | |  | | |  | | **ρ** | | **p-value** | **ρ** | | **p-value** |
| **Physical performance scales** | **Total SPPB score** | **Overall** | 60 |  |  |  |  |  | 60 | -0.3410 | 0.0077 |  |  |  | | 60 | |  |  |  |  | |  | | | 60 | | -0.3449 | | 0.0070 |  | |  |
| **HP** | 20 |  |  |  |  |  | 20 |  |  |  |  |  | | 20 | |  |  |  |  | |  | | | 20 | |  | |  |  | |  |
| **AP** | 20 | -0.3969 | 0.0831 |  |  |  | 20 |  |  |  |  |  | | 20 | |  |  |  |  | |  | | | 20 | |  | |  |  | |  |
| **LP** | 20 |  |  |  |  |  | 20 | -0.5467 | 0.0126 |  |  |  | | 20 | |  |  |  |  | |  | | | 20 | | -0.6754 | | 0.0011 |  | |  |
| **Usual gait speed** | **Overall** | 60 | -0.2486 | 0.0554 | -0.2457 | 0.0585 |  | 60 | -0.2316 | 0.0749 | -0.2624 | 0.0428 |  | | 60 | | -0.2345 | 0.0713 | -0.2780 | 0.0315 | |  | | | 60 | |  | |  |  | |  |
| **HP** | 20 | -0.3944 | 0.0853 |  |  |  | 20 |  |  | -0.5913 | 0.0060 |  | | 20 | | -0.4018 | 0.0791 |  |  | |  | | | 20 | |  | |  | -0.5158 | | 0.0199 |
| **AP** | 20 |  |  |  |  |  | 20 |  |  |  |  |  | | 20 | |  |  |  |  | |  | | | 20 | |  | |  |  | |  |
| **LP** | 20 |  |  |  |  |  | 20 | -0.3899 | 0.0892 |  |  |  | | 20 | |  |  |  |  | |  | | | 20 | | -0.4039 | | 0.0774 |  | |  |
| **SPPB gait speed score** | **Overall** | 60 | . | . | . | . |  | 60 |  |  |  |  |  | | 60 | | . | . | . | . | |  | | | 60 | |  | |  |  | |  |
| **HP** | 20 | . | . | . | . |  | 20 |  |  |  |  |  | | 20 | | . | . | . | . | |  | | | 20 | |  | |  |  | |  |
| **AP** | 20 | . | . | . | . |  | 20 |  |  |  |  |  | | 20 | | . | . | . | . | |  | | | 20 | |  | |  |  | |  |
| **LP** | 20 | . | . | . | . |  | 20 |  |  |  |  |  | | 20 | | . | . | . | . | |  | | | 20 | |  | |  |  | |  |
| **Fast gait speed** | **Overall** | 60 | -0.3779 | 0.0029 | -0.2709 | 0.0363 |  | 60 | -0.3426 | 0.0074 |  |  |  | | 60 | | -0.3848 | 0.0024 | -0.3414 | 0.0076 | |  | | | 60 | | -0.2998 | | 0.0199 |  | |  |
| **HP** | 20 | -0.3973 | 0.0828 |  |  |  | 20 |  |  |  |  |  | | 20 | |  |  |  |  | |  | | | 20 | |  | |  |  | |  |
| **AP** | 20 | -0.5843 | 0.0068 |  |  |  | 20 |  |  |  |  |  | | 20 | | -0.6138 | 0.0040 | -0.5121 | 0.0210 | |  | | | 20 | |  | |  |  | |  |
| **LP** | 20 |  |  |  |  |  | 20 | -0.4027 | 0.0784 |  |  |  | | 20 | |  |  |  |  | |  | | | 20 | | -0.4808 | | 0.0319 |  | |  |
| **Best Grip Strength** | **Overall** | 60 | -0.2290 | 0.0784 | -0.2712 | 0.0361 |  | 60 | -0.4865 | <.0001 |  |  |  | | 60 | | -0.2420 | 0.0625 | -0.2865 | 0.0265 | |  | | | 60 | | -0.4736 | | 0.0001 |  | |  |
| **HP** | 20 | -0.6538 | 0.0018 |  |  |  | 20 | -0.8234 | <.0001 |  |  |  | | 20 | | -0.5950 | 0.0057 |  |  | |  | | | 20 | | -0.8071 | | <.0001 |  | |  |
| **AP** | 20 | -0.9287 | <.0001 |  |  |  | 20 | -0.7926 | <.0001 |  |  |  | | 20 | | -0.9214 | <.0001 |  |  | |  | | | 20 | | -0.7695 | | <.0001 |  | |  |
| **LP** | 20 |  |  |  |  |  | 20 | -0.5214 | 0.0184 | -0.4339 | 0.0559 |  | | 20 | |  |  | -0.3857 | 0.0931 | |  | | | 20 | | -0.4842 | | 0.0305 |  | |  |
| **Time for 5 chair stands** | **Overall** | 60 | 0.2167 | 0.0964 |  |  |  | 60 | 0.2890 | 0.0251 |  |  |  | | 60 | | 0.2321 | 0.0744 | 0.2372 | 0.0680 | |  | | | 60 | | 0.2226 | | 0.0874 |  | |  |
| **HP** | 20 |  |  |  |  |  | 20 | 0.4782 | 0.0329 |  |  |  | | 20 | | 0.4105 | 0.0722 |  |  | |  | | | 20 | | 0.4355 | | 0.0549 |  | |  |
| **AP** | 20 | 0.6797 | 0.0010 |  |  |  | 20 |  |  |  |  |  | | 20 | | 0.6662 | 0.0013 |  |  | |  | | | 20 | |  | |  |  | |  |
| **LP** | 20 |  |  |  |  |  | 20 | 0.4004 | 0.0802 |  |  |  | | 20 | |  |  |  |  | |  | | | 20 | | 0.4301 | | 0.0584 |  | |  |
| **RCS 30s** | **Overall** | 60 | -0.2931 | 0.0230 | -0.2165 | 0.0966 |  | 60 | -0.3028 | 0.0187 |  |  |  | | 60 | | -0.2878 | 0.0258 | -0.2433 | 0.0610 | |  | | | 60 | | -0.2910 | | 0.0241 |  | |  |
| **HP** | 20 | -0.5277 | 0.0168 |  |  |  | 20 | -0.5376 | 0.0145 |  |  |  | | 20 | | -0.6012 | 0.0050 |  |  | |  | | | 20 | | -0.5884 | | 0.0064 |  | |  |
| **AP** | 20 | -0.8209 | <.0001 |  |  |  | 20 | -0.5602 | 0.0102 |  |  |  | | 20 | | -0.8326 | <.0001 |  |  | |  | | | 20 | | -0.6623 | | 0.0015 |  | |  |
| **LP** | 20 |  |  |  |  |  | 20 |  |  |  |  |  | | 20 | |  |  |  |  | |  | | | 20 | | -0.3800 | | 0.0984 |  | |  |
| **6 min walk test** | **Overall** | 59 | -0.3053 | 0.0187 | -0.3288 | 0.0110 |  | 58 | -0.4509 | 0.0004 | -0.3290 | 0.0117 |  | | 59 | | -0.3011 | 0.0205 | -0.3433 | 0.0078 | |  | | | 58 | | -0.4570 | | 0.0003 | -0.3035 | | 0.0205 |
| **HP** | 20 | -0.5211 | 0.0185 | -0.4498 | 0.0466 |  | 19 | -0.4631 | 0.0459 |  |  |  | | 20 | | -0.4331 | 0.0565 |  |  | |  | | | 19 | | -0.5088 | | 0.0261 |  | |  |
| **AP** | 20 |  |  |  |  |  | 19 | -0.5639 | 0.0119 | -0.6478 | 0.0027 |  | | 20 | |  |  |  |  | |  | | | 19 | | -0.4860 | | 0.0349 | -0.5645 | | 0.0118 |
| **LP** | 19 |  |  |  |  |  | 20 | -0.4062 | 0.0755 |  |  |  | | 19 | |  |  |  |  | |  | | | 20 | | -0.4541 | | 0.0443 |  | |  |
| **PROMIS score** | **Overall** | 60 | -0.3830 | 0.0025 |  |  |  | 60 | -0.4693 | 0.0002 | -0.2829 | 0.0285 |  | | 60 | | -0.3877 | 0.0022 |  |  | |  | | | 60 | | -0.4240 | | 0.0007 | -0.2383 | | 0.0667 |
| **HP** | 20 | -0.3814 | 0.0971 |  |  |  | 20 | -0.6848 | 0.0009 |  |  |  | | 20 | |  |  |  |  | |  | | | 20 | | -0.6898 | | 0.0008 |  | |  |
| **AP** | 20 | -0.4326 | 0.0568 |  |  |  | 20 | -0.4271 | 0.0603 |  |  |  | | 20 | | -0.4005 | 0.0802 |  |  | |  | | | 20 | |  | |  |  | |  |
| **LP** | 20 | -0.4087 | 0.0736 |  |  |  | 20 | -0.4422 | 0.0509 | -0.4645 | 0.0391 |  | | 20 | | -0.4144 | 0.0692 |  |  | |  | | | 20 | | -0.4155 | | 0.0685 | -0.4164 | | 0.0678 |
| **SF36 PFS raw score** | **Overall** | 60 | -0.5103 | <.0001 | -0.2172 | 0.0955 |  | 60 | -0.5011 | <.0001 | -0.3132 | 0.0148 |  | | 60 | | -0.4905 | <.0001 | -0.2212 | 0.0894 | |  | | | 60 | | -0.5087 | | <.0001 | -0.2604 | | 0.0445 |
| **HP** | 20 |  |  | -0.5478 | 0.0124 |  | 20 | -0.5636 | 0.0097 |  |  |  | | 20 | | -0.3812 | 0.0973 |  |  | |  | | | 20 | | -0.5669 | | 0.0091 | -0.4378 | | 0.0535 |
| **AP** | 20 | -0.6831 | 0.0009 |  |  |  | 20 | -0.4827 | 0.0311 |  |  |  | | 20 | | -0.7353 | 0.0002 |  |  | |  | | | 20 | | -0.3840 | | 0.0946 |  | |  |
| **LP** | 20 | -0.4552 | 0.0437 |  |  |  | 20 | -0.6112 | 0.0042 | -0.4448 | 0.0494 |  | | 20 | |  |  |  |  | |  | | | 20 | | -0.7080 | | 0.0005 | -0.5080 | | 0.0222 |
| **BMD values** | **Total BMD** | **Overall** | 56 | -0.2961 | 0.0267 | 0.3071 | 0.0213 |  | 60 | -0.3989 | 0.0016 |  |  |  | | 56 | | -0.2545 | 0.0583 | 0.3413 | 0.0101 | |  | | | 60 | | -0.4132 | | 0.0010 |  | |  |
| **HP** | 18 | -0.6507 | 0.0035 |  |  |  | 20 | -0.4174 | 0.0671 |  |  |  | | 18 | | -0.4781 | 0.0448 |  |  | |  | | | 20 | | -0.3949 | | 0.0849 |  | |  |
| **AP** | 20 |  |  |  |  |  | 20 |  |  |  |  |  | | 20 | |  |  |  |  | |  | | | 20 | |  | |  |  | |  |
| **LP** | 18 |  |  | 0.4620 | 0.0536 |  | 20 | -0.4238 | 0.0626 |  |  |  | | 18 | |  |  | 0.5196 | 0.0271 | |  | | | 20 | | -0.5243 | | 0.0176 |  | |  |
| **Spine BMD** | **Overall** | 57 | -0.2357 | 0.0775 |  |  |  | 60 |  |  | 0.2168 | 0.0961 |  | | 57 | | -0.2554 | 0.0552 |  |  | |  | | | 60 | |  | |  |  | |  |
| **HP** | 19 | -0.5703 | 0.0108 |  |  |  | 20 |  |  |  |  |  | | 19 | | -0.5450 | 0.0158 |  |  | |  | | | 20 | |  | |  |  | |  |
| **AP** | 20 |  |  |  |  |  | 20 |  |  |  |  |  | | 20 | |  |  |  |  | |  | | | 20 | |  | |  |  | |  |
| **LP** | 18 |  |  |  |  |  | 20 |  |  | 0.3996 | 0.0809 |  | | 18 | |  |  |  |  | |  | | | 20 | |  | |  |  | |  |
| **Femoral Neck BMD** | **Overall** | 57 | -0.6350 | <.0001 |  |  |  | 60 | -0.5738 | <.0001 |  |  |  | | 57 | | -0.6843 | <.0001 |  |  | |  | | | 60 | | -0.5113 | | <.0001 |  | |  |
| **HP** | 19 | -0.6550 | 0.0023 |  |  |  | 20 | -0.5835 | 0.0069 | -0.3794 | 0.0990 |  | | 19 | | -0.7000 | 0.0008 |  |  | |  | | | 20 | | -0.4453 | | 0.0491 | -0.4304 | | 0.0582 |
| **AP** | 20 | -0.6890 | 0.0008 |  |  |  | 20 | -0.7356 | 0.0002 |  |  |  | | 20 | | -0.7368 | 0.0002 |  |  | |  | | | 20 | | -0.6807 | | 0.0010 |  | |  |
| **LP** | 18 | -0.5720 | 0.0131 |  |  |  | 20 | -0.4354 | 0.0550 |  |  |  | | 18 | | -0.6409 | 0.0042 |  |  | |  | | | 20 | | -0.4105 | | 0.0722 |  | |  |
| **Lean/fat mass** | **Total Lean Mass** | **Overall** | 57 | -0.3639 | 0.0054 | 0.3643 | 0.0053 |  | 60 |  |  | 0.3563 | 0.0052 |  | | 57 | | -0.3830 | 0.0033 | 0.3360 | 0.0106 | |  | | | 60 | | -0.2604 | | 0.0445 | 0.3342 | | 0.0091 |
| **HP** | 19 |  |  | 0.6121 | 0.0053 |  | 20 |  |  |  |  |  | | 19 | |  |  | 0.6655 | 0.0019 | |  | | | 20 | |  | |  |  | |  |
| **AP** | 20 | -0.5918 | 0.0060 |  |  |  | 20 |  |  | 0.7306 | 0.0003 |  | | 20 | | -0.5383 | 0.0143 |  |  | |  | | | 20 | |  | |  | 0.6629 | | 0.0014 |
| **LP** | 18 |  |  | 0.4585 | 0.0556 |  | 20 |  |  |  |  |  | | 18 | |  |  | 0.4407 | 0.0672 | |  | | | 20 | |  | |  |  | |  |
| **Total Fat Mass** | **Overall** | 57 | 0.2381 | 0.0745 | 0.8731 | <.0001 |  | 60 | 0.3956 | 0.0018 | 0.8537 | <.0001 |  | | 57 | | 0.2482 | 0.0627 | 0.8316 | <.0001 | |  | | | 60 | | 0.3938 | | 0.0019 | 0.8370 | | <.0001 |
| **HP** | 19 |  |  | 0.8485 | <.0001 |  | 20 | 0.4741 | 0.0347 | 0.8191 | <.0001 |  | | 19 | |  |  | 0.7234 | 0.0005 | |  | | | 20 | | 0.4331 | | 0.0565 | 0.7845 | | <.0001 |
| **AP** | 20 | 0.5002 | 0.0247 | 0.8394 | <.0001 |  | 20 |  |  | 0.8090 | <.0001 |  | | 20 | | 0.4090 | 0.0733 | 0.8402 | <.0001 | |  | | | 20 | |  | |  | 0.9082 | | <.0001 |
| **LP** | 18 |  |  | 0.9553 | <.0001 |  | 20 | 0.6268 | 0.0031 | 0.9304 | <.0001 |  | | 18 | |  |  | 0.9298 | <.0001 | |  | | | 20 | | 0.6632 | | 0.0014 | 0.8528 | | <.0001 |
| **Total Fat Percent** | **Overall** | 57 | 0.3822 | 0.0033 | 0.6147 | <.0001 |  | 60 | 0.4764 | 0.0001 | 0.5639 | <.0001 |  | | 57 | | 0.3534 | 0.0070 | 0.6596 | <.0001 | |  | | | 60 | | 0.5062 | | <.0001 | 0.6682 | | <.0001 |
| **HP** | 19 |  |  | 0.7337 | 0.0004 |  | 20 | 0.5095 | 0.0218 | 0.6979 | 0.0006 |  | | 19 | |  |  | 0.6037 | 0.0062 | |  | | | 20 | | 0.5122 | | 0.0209 | 0.7359 | | 0.0002 |
| **AP** | 20 | 0.6743 | 0.0011 |  |  |  | 20 |  |  |  |  |  | | 20 | | 0.5744 | 0.0081 | 0.5175 | 0.0194 | |  | | | 20 | |  | |  | 0.4650 | | 0.0388 |
| **LP** | 18 |  |  | 0.8787 | <.0001 |  | 20 | 0.7046 | 0.0005 | 0.8374 | <.0001 |  | | 18 | |  |  | 0.9195 | <.0001 | |  | | | 20 | | 0.6702 | | 0.0012 | 0.8614 | | <.0001 |

Pearson correlations (r) and Spearman Rank correlations (ρ) with p-value < 0.1 are shown in the Table.

**Supplementary Table 2.** Pearson and Spearman correlations for age/BMI with different physical performance scales, BMD values, and lean/fat mass in humans.


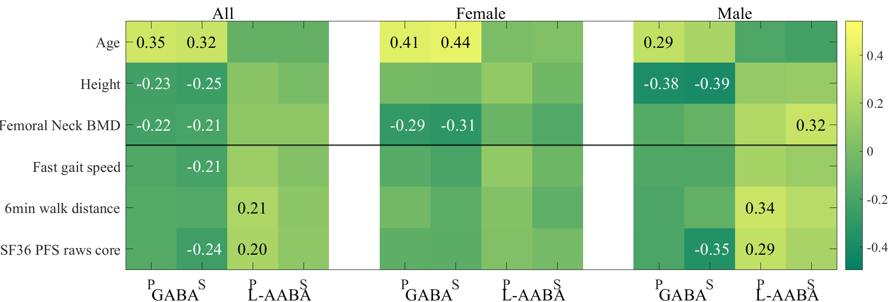


**Supplementary Figure 1.** Heatmaps of correlations of the GABA and L-AABA in 120 white non-Hispanic individuals (aged 20–85 years) with different gender.


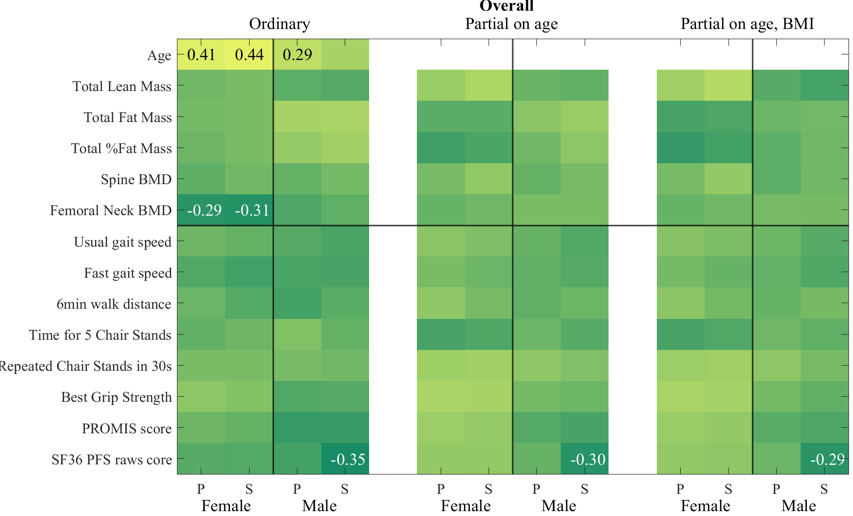

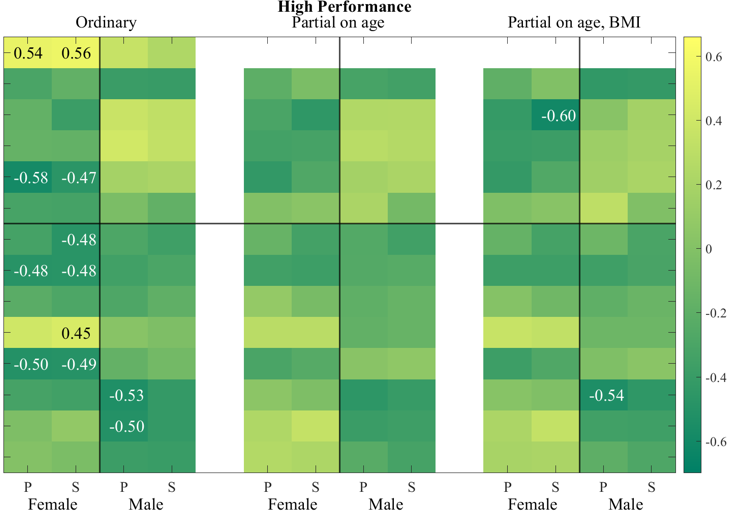


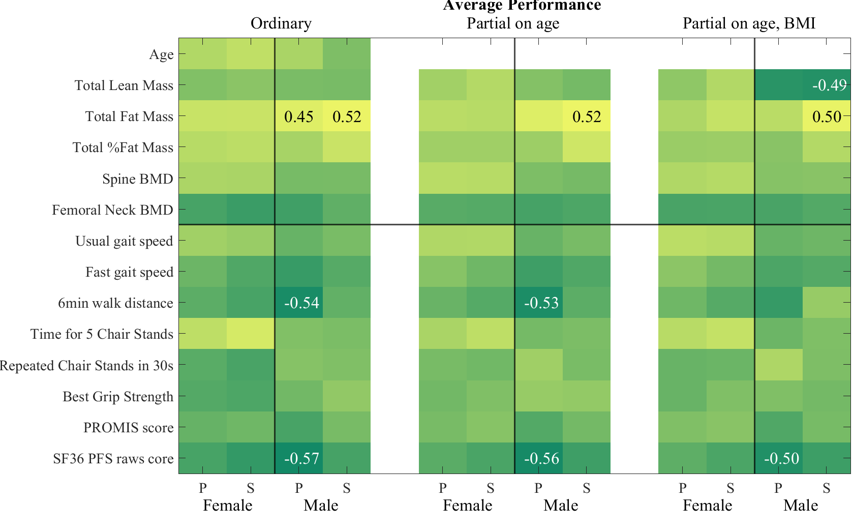

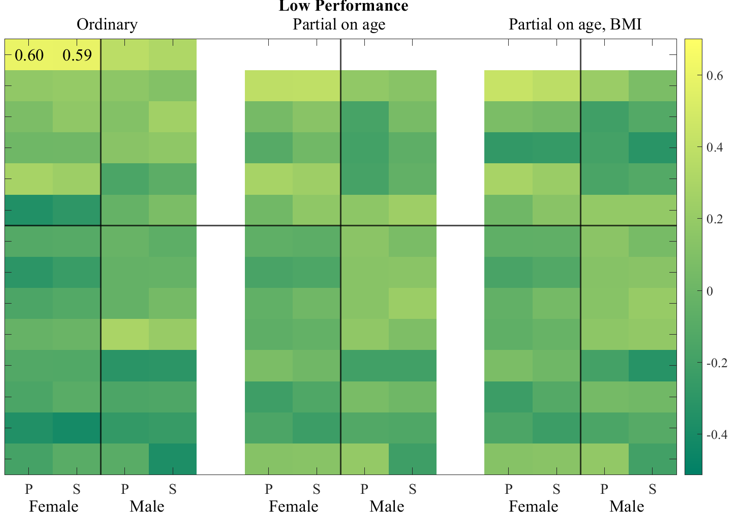


GABA

**Supplementary Figure 2.** Heatmaps of GABA associations with age and after controlling the effects of age and BMI, in overall (120 samples), HP, AP and LP groups.
